# Supplementary material
Source: HighWire-hosted journal article supplement (https://bmjopen.bmj.com/content/10/1/e032257)
Supplement: inline-supplementary-material-1 [file inline-supplementary-material-1.pdf]

**Additional table 1. Additional characteristics of the informal caregivers**

|                                                    | <b>N=77</b> |
|----------------------------------------------------|-------------|
| Handicap financial allocation                      | 64 (83.1)   |
| Housing fitting out allocation                     | 7 (9)       |
| Human assistance at home                           | 15 (19.5)   |
| Technical assistance allocation                    | 39 (50.6)   |
| Psychologist/psychiatric contact                   | 17 (22.1)   |
| Social worker contact                              | 33 (42.9)   |
| Handicap association Contact                       | 20 (26.7)   |
| Satisfaction about the care support                | 30 (40.3)   |
| Satisfaction with the medical information delivery | 29 (37.7)   |
| Family's contact preservation                      | 69 (89.5)   |
| Leisure preservation                               | 29 (37.7)   |
| Holidays preservation                              | 34 (44.2)   |

**Additional table 2. Relationships between self-perceived burden of caregivers and the neurodevelopmental and functional status of PLH children**

|                                            |         | <b>Self-<br/>esteem<br/>[0-100]*</b> | <b>Familial<br/>support<br/>[0-100]**</b> | <b>Financial<br/>[0-100]**</b> | <b>Planifi-<br/>cation<br/>[0-100]**</b> | <b>Health<br/>[0-100]**</b> |
|--------------------------------------------|---------|--------------------------------------|-------------------------------------------|--------------------------------|------------------------------------------|-----------------------------|
| <b>Neurodevelopment status<sup>°</sup></b> |         |                                      |                                           |                                |                                          |                             |
| Language                                   | R       | -0.055                               | -0.199                                    | 0.193                          | -0.115                                   | 0.066                       |
|                                            | p-value | 0.656                                | 0.109                                     | 0.114                          | 0.354                                    | 0.596                       |
| Posture-motor ability                      | R       | 0.017                                | -0.073                                    | 0.239                          | -0.053                                   | 0.059                       |
|                                            | p-value | 0.890                                | 0.562                                     | 0.050                          | 0.671                                    | 0.634                       |
| Coordination                               | R       | 0.042                                | -0.184                                    | 0.183                          | -0.142                                   | 0.059                       |
|                                            | p-value | 0.744                                | 0.157                                     | 0.151                          | 0.271                                    | 0.648                       |
| Sociability                                | R       | -0.250                               | -0.048                                    | 0.252                          | -0.055                                   | 0.070                       |
|                                            | p-value | 0.063                                | 0.729                                     | 0.061                          | 0.688                                    | 0.611                       |
| <b>Functional indices<sup>°°</sup></b>     |         |                                      |                                           |                                |                                          |                             |
| Orthopedic index [0-5]                     | R       | -0.053                               | 0.434**                                   | 0.108                          | 0.262*                                   | 0.295*                      |
|                                            | p-value | 0.654                                | <b>&lt;0.001</b>                          | 0.363                          | <b>0.026</b>                             | <b>0.012</b>                |
| Respiratory index [0-5]                    | R       | 0.041                                | 0.150                                     | 0.183                          | 0.257*                                   | 0.183                       |
|                                            | p-value | 0.734                                | 0.214                                     | 0.123                          | <b>0.031</b>                             | 0.127                       |
| Digestive index[0-4]                       | R       | 0.054                                | 0.264*                                    | 0.168                          | 0.099                                    | 0.263*                      |
|                                            | p-value | 0.647                                | <b>0.026</b>                              | 0.156                          | 0.410                                    | <b>0.025</b>                |
| Urologic index [0-3]                       | R       | 0.213                                | 0.240*                                    | 0.108                          | 0.192                                    | -0.027                      |
|                                            | p-value | 0.072                                | <b>0.045</b>                              | 0.368                          | 0.109                                    | 0.820                       |
| Pain index [0-4]                           | R       | 0.094                                | 0.292*                                    | -0.155                         | 0.208                                    | 0.131                       |
|                                            | p-value | 0.427                                | <b>0.013</b>                              | 0.191                          | 0.080                                    | 0.273                       |
| Skin index [0-6]                           | R       | 0.260*                               | 0.239*                                    | -0.024                         | 0.120                                    | 0.076                       |
|                                            | p-value | <b>0.027</b>                         | <b>0.045</b>                              | 0.839                          | 0.313                                    | 0.528                       |
| Sleep disorders index [0-4]                | R       | 0.083                                | 0.206                                     | 0.096                          | 0.258*                                   | 0.154                       |
|                                            | p-value | 0.491                                | 0.089                                     | 0.427                          | <b>0.031</b>                             | 0.203                       |

\* 100: best self-esteem, \*\* 100: worse familial support, worse financial impact, worse planification impact, worse health impact

<sup>°</sup> Neurodevelopmental status levels range from 0 to 24 months

<sup>°°</sup> Higher scores: higher level of organ disorders

Bold values: p-value <0.05

**Additional table 3. Factors associating with caregivers' self-perceived burden of parents' (using Generalized Estimating Equations models)**

|                                                        |                     | <i>Self-esteem</i> |              | Familial support* |              | Financial* |              | Planification* |              | Health* |              |
|--------------------------------------------------------|---------------------|--------------------|--------------|-------------------|--------------|------------|--------------|----------------|--------------|---------|--------------|
|                                                        |                     | $\beta$            | p-value      | $\beta$           | p-value      | $\beta$    | p-value      | $\beta$        | p-value      | $\beta$ | p-value      |
| <b>1. Caregivers' variables</b>                        |                     |                    |              |                   |              |            |              |                |              |         |              |
| Age of the parent                                      |                     |                    |              |                   |              | 0.323      | 0.192        |                |              | 0.043   | 0.839        |
| Other person with disability at home (0 no, 1 yes)     |                     | -5.365             | 0,253        |                   |              | -10.48     | <b>0.015</b> |                |              |         |              |
| Financial status (0 not difficult, 1 difficult)        |                     |                    |              |                   |              | -9.164     | 0.112        |                |              |         |              |
| Chronic disease (0 no, 1 yes)                          |                     |                    |              |                   |              | -5.390     | 0.364        |                |              | -9.251  | <b>0.014</b> |
| Hospitalization episode (0 no, 1 yes)                  |                     | -6,203             | 0,085        |                   |              |            |              | -5.564         | 0.216        |         |              |
| Quality of life                                        | Physical            | -0.158             | 0.226        | -0.394            | <b>0.019</b> | -0.191     | 0.168        | -0.354         | <b>0.005</b> |         |              |
|                                                        | Psychological       | 0.033              | 0.811        | 0.137             | 0.561        | 0.379      | <b>0.027</b> | 0.360          | <b>0.011</b> |         |              |
|                                                        | Social              | 0.039              | 0.749        | 0.104             | 0.424        | -0.212     | <b>0.039</b> | 0.143          | 0.103        |         |              |
|                                                        | Environ.            | -0.096             | 0.529        | -0.345            | <b>0.042</b> | -0.266     | 0.128        | -0.394         | <b>0.003</b> |         |              |
| Anxiety-mood score                                     |                     | 1.130              | 0.130        |                   |              |            |              | 0.858          | 0.237        |         | <b>0.044</b> |
| Coping                                                 | Social support      | -0.265             | <b>0.002</b> |                   |              |            |              |                |              |         |              |
|                                                        | Avoidance           |                    |              |                   |              |            |              | -0.006         | 0.975        | 0.116   | 0.436        |
|                                                        | Positive thinking   |                    |              |                   |              | -0.051     | 0.659        |                |              |         |              |
| Daily time caregiving                                  | (0: <=4h, 1: [5-8]) | -0.997             | 0.845        |                   |              |            |              | -7.346         | 0.133        |         |              |
|                                                        | (0: <=4h, 2: >=9)   | -4.602             | 0.257        |                   |              |            |              | 0.275          | 0.943        |         |              |
| Get up during night (0: <2, 1: >=2)                    |                     | -9.711             | <b>0.005</b> |                   |              |            |              | -8.819         | <b>0.025</b> | -5.815  | <b>0.048</b> |
| <b>2. PLH individuals' variables</b>                   |                     |                    |              |                   |              |            |              |                |              |         |              |
| Gender of the PLH individual (0 boy/man, 1 girl/woman) |                     | 4.680              | 0.201        |                   |              |            |              |                |              |         |              |
| Age of the PLH individual                              |                     | 0.809              | <b>0.010</b> |                   |              |            |              |                |              | 1.208   | <b>0.015</b> |

$\beta$  beta standardized coefficient; Bold values: p-value <0.05

\* higher scores, worse burden
